# Supplementary material for: Minimally Invasive Surgery for Pilonidal Abscess Under Laparoscopic Guidance: A Retrospective Study
Source: Research Square preprint supplement (doi:10.21203/rs.3.rs-6134995/v1), 2025-05-12
Supplement: Supplementary file 1 [file 70a46ee01d7bd201471b077c.pdf]

## Supplementary Explanation Document for Project Filing

Dear Editor:

This project has been filed in the National Medical Research Registration and Filing System, with the filing number: pid:265621. It has also been registered with the Chinese Clinical Trial Registration Center, with the registration code: PID:263756.

Best regards!

Project Leader: Wang Qibin

March 13, 2025
