# Supplementary material for: Minimally Invasive Surgery for Pilonidal Abscess Under Laparoscopic Guidance: A Retrospective Study
Source: Research Square preprint supplement (doi:10.21203/rs.3.rs-6134995/v1), 2025-05-12
Supplement: Supplementary file 2 [file f178cf455b224d41a2a4dde1.pdf]

## Data Availability Statement

- The datasets generated and/or analyzed during the current study are available in the China National Clinical Medical Research Registration and Record Center or the Chinese Clinical Trial Registry. Database links:

<https://www.medicalresearch.org.cn/>

<https://www.chictr.org.cn/>

- The datasets analyzed in this study are available from the corresponding author upon reasonable request. Contact emails: [wqb5218@163.com](mailto:wqb5218@163.com), [mzq6058@sina.com](mailto:mzq6058@sina.com).
- All data generated or analyzed during this study are included in the published article.

**Author:** Qibin Wang

**Date:** March 19, 2025
